# Supplementary material for: Role of a single noncoding nucleotide in the evolution of an epidemic African clade of Salmonella
Source: PubMed Central journal article supplement — Proc Natl Acad Sci U S A. 2018 Feb 27;115(11):E2614–23. doi: 10.1073/pnas.1714718115 (PMC5856525; doi:10.1073/pnas.1714718115), 2018-02-27
Supplement: pnas.201714718SI.pdf [file pnas.201714718SI.pdf]

# Supporting Information

Hammarlöf et al. 10.1073/pnas.1714718115

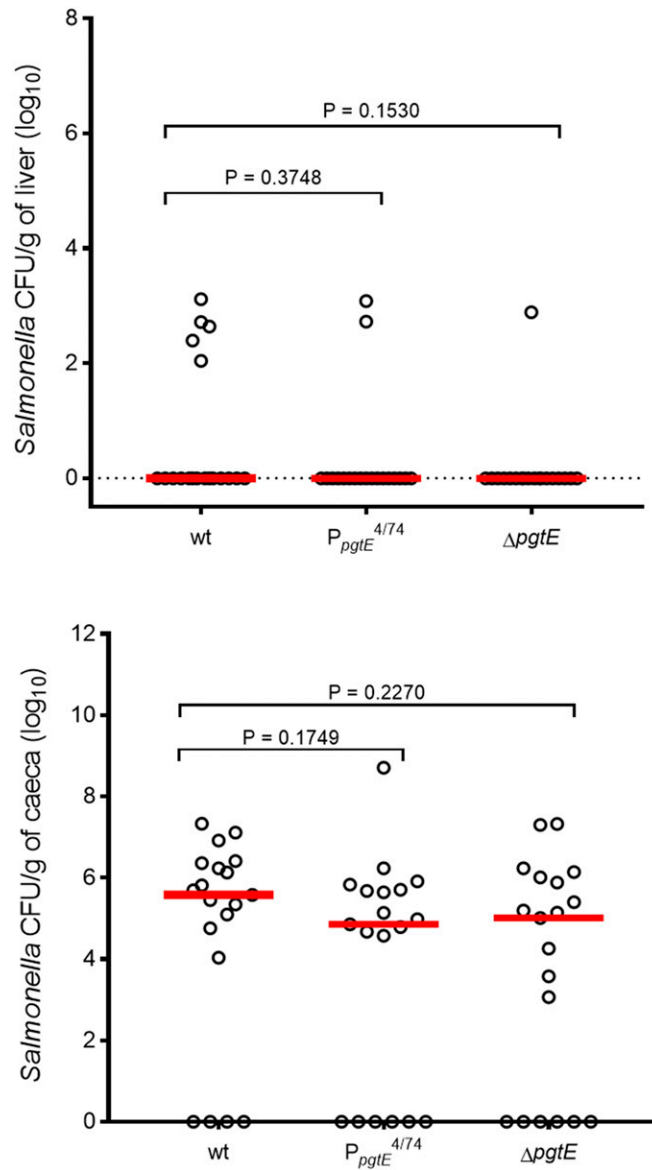

**Fig. S1.** The T<sup>D23580</sup> SNP in the *pgtE* promoter of *Salmonella* Typhimurium does not affect colonization of the liver or caeca in the chicken infection model. Viable counts of *S. Typhimurium* D23580-derived strains as log CFU/g of liver and caeca at 3-d postoral infection ( $10^8$  CFU) of 7-d-old Lohmann Brown Layers. Data based on 19 individually sampled birds for each group; combined data for two separately repeated experiments. Each symbol represents the value for an individual chicken and the bars represent the median value for each group.

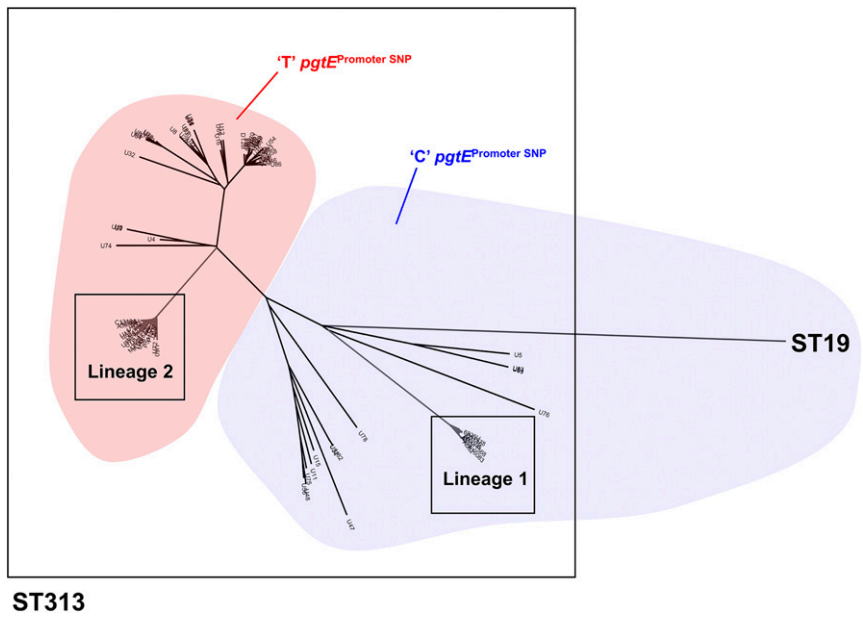

**Fig. S2.** Radial phylogeny illustrating the population structure of *S. Typhimurium* ST313 in the context of the *pgtE* promoter SNP. The phylogenetic tree is reproduced with permission (69). Red and blue colored areas represent the presence of the T<sup>D23580</sup> or C<sup>4/74</sup> genotype, respectively. Black-outlined box indicates the isolates belonging to the 313 sequence type.

**Table S1. Bacterial strains and plasmids**

| Bacterial strains or plasmids         | Description*                                                                                                                                                | Source        |
|---------------------------------------|-------------------------------------------------------------------------------------------------------------------------------------------------------------|---------------|
| <b>Bacteria</b>                       |                                                                                                                                                             |               |
| <b>S. Typhimurium ST19</b>            |                                                                                                                                                             |               |
| 4/74 derivatives                      |                                                                                                                                                             |               |
| 4/74                                  | 4/74 wild-type                                                                                                                                              | (69)          |
| JH3827                                | 4/74 $\Delta$ <i>pgtE::frt</i> $\Delta$ <i>waaG::Kan</i> ; Km <sup>R</sup>                                                                                  | Present study |
| JH3915                                | 4/74 P <sub><i>pgtE</i></sub> <sup>D23580</sup>                                                                                                             | Present study |
| JH3919                                | 4/74 $\Delta$ <i>waaG::Kan</i> ; Km <sup>R</sup>                                                                                                            | Present study |
| JH4140                                | 4/74 <i>pgtE</i> -FLAG- <i>frt</i>                                                                                                                          | Present study |
| JH4149                                | 4/74 P <sub><i>pgtE</i></sub> <sup>D23580</sup> , <i>pgtE</i> -FLAG- <i>frt</i>                                                                             | Present study |
| JH4158                                | 4/74 $\Delta$ <i>pgtE::frt</i>                                                                                                                              | Present study |
| LT2 derivatives                       |                                                                                                                                                             |               |
| LT2                                   | LT2 wild-type                                                                                                                                               | (70)          |
| JH4147                                | LT2 <i>pgtE</i> -FLAG- <i>frt</i>                                                                                                                           | Present study |
| 14028s derivatives                    |                                                                                                                                                             |               |
| 14028s                                | 14028s wild-type                                                                                                                                            | (71)          |
| JH4148                                | 14028s <i>pgtE</i> -FLAG- <i>frt</i>                                                                                                                        | Present study |
| <b>S. Typhimurium ST313 lineage 1</b> |                                                                                                                                                             |               |
| A130 derivatives                      |                                                                                                                                                             |               |
| A130                                  | A130 wild-type                                                                                                                                              | (5)           |
| JH4150                                | A130 <i>pgtE</i> -FLAG- <i>frt</i>                                                                                                                          | Present study |
| D25248 derivatives                    |                                                                                                                                                             |               |
| D25248                                | D25248 wild-type                                                                                                                                            | (5)           |
| JH4151                                | D25248 <i>pgtE</i> -FLAG- <i>frt</i>                                                                                                                        | Present study |
| ST313 lineage 2                       |                                                                                                                                                             |               |
| D23580 derivatives                    |                                                                                                                                                             |               |
| D23580                                | D23580 wild-type                                                                                                                                            | (5)           |
| JH3812                                | D23580 P <sub><i>pgtE</i></sub> <sup>4/74</sup>                                                                                                             | Present study |
| JH3813                                | D23580 $\Delta$ <i>pgtE::frt</i>                                                                                                                            |               |
| JH3828                                | D23580 $\Delta$ <i>pgtE::frt</i> , $\Delta$ <i>waaG::Kan</i> ; Km <sup>R</sup>                                                                              |               |
| JH4154                                | D23580 <i>pgtE</i> -FLAG- <i>frt</i>                                                                                                                        | Present study |
| JH4156                                | D23580 P <sub><i>pgtE</i></sub> <sup>4/74</sup> , <i>pgtE</i> -FLAG- <i>frt</i>                                                                             | Present study |
| D37712 derivatives                    |                                                                                                                                                             |               |
| D37712                                | D37712 wild-type                                                                                                                                            | (72)          |
| JH4151                                | D37712 <i>pgtE</i> -FLAG- <i>frt</i>                                                                                                                        | Present study |
| <b>Escherichia coli</b>               |                                                                                                                                                             |               |
| S17-1 $\lambda$ <i>pir</i>            | <i>pro thi hsdR recA</i> chromosome::RP4-2 Tc::Mu Km::Tn7/ $\lambda$ <i>pir</i> ; Tp <sup>R</sup> , Sm <sup>R</sup>                                         | (73)          |
| <b>Plasmids</b>                       |                                                                                                                                                             |               |
| pCP20-TcR                             | FLP recombinase expression plasmid; Tc <sup>R</sup>                                                                                                         | (57)          |
| pEMG                                  | Suicide plasmid; Km <sup>R</sup>                                                                                                                            | (60)          |
| pKD3                                  | <i>frt-cat-frt</i> cassette template plasmid; Cm <sup>R</sup>                                                                                               | (53)          |
| pKD4                                  | <i>frt-aph-frt</i> cassette template plasmid; Km <sup>R</sup>                                                                                               | (53)          |
| pNAW41                                | pEMG carrying a 989 bp EcoRI/BamHI fragment corresponding to P <sub><i>pgtE</i></sub> <sup>D23580</sup> flanked by ~500-bp regions of 4/74; Km <sup>R</sup> | Present study |
| pSIM5- <i>tet</i>                     | $\lambda$ <i>red</i> recombination plasmid, temperature-inducible; Tc <sup>R</sup>                                                                          | (55)          |
| pSW-2                                 | Plasmid for <i>m</i> -toluene-inducible expression of the I-SceI enzyme; Gm <sup>R</sup>                                                                    | (60)          |

\*Relevant antibiotic resistances are indicated by<sup>R</sup>: Gm, gentamicin; Km, kanamycin; Sm, streptomycin; Tc, tetracycline; Tp, trimethoprim. "P<sub>*pgtE*</sub><sup>4/74</sup>" or "P<sub>*pgtE*</sub><sup>D23580</sup>" indicate the corresponding allele of the *pgtE* promoter. The residual FLP recognition target sequence coming from plasmid pKD3 and pKD4 are indicated by *frt*. The term "Kan" denotes the presence of an *frt-aph-frt* module (Km<sup>R</sup>) from pKD4. The natural resistances of ST313 strains (5) and derivatives are not indicated.

**Table S2. ssDNA oligonucleotides used in this study**

| Oligo name | Sequence (5' → 3')*                                                               | Comments                                                                                                                            |
|------------|-----------------------------------------------------------------------------------|-------------------------------------------------------------------------------------------------------------------------------------|
| DH90       | AATCTGGAGAGGTGATGAAGTTTTTCATCTT <u>GT</u> CAAATCGTCGGAC-<br>AAGAGTACATTTATTA      | T <sup>D23580</sup> → C <sup>4/74</sup> substitution in -10 <i>pgtE</i> promoter of D23580<br>by $\lambda$ <i>red</i> recombination |
| DH40       | GGGAGCTGGTTTATGATACC                                                              | Used for diagnostic PCR of the <i>pgtE</i> allele                                                                                   |
| DH41       | AATTGAACGATCGGTCCAGC                                                              |                                                                                                                                     |
| DH54       | CGAACACTACATGCGCAAAC                                                              | Used for qRT-PCR of the <i>pgtE</i> transcript                                                                                      |
| DH55       | ACCGCCCTTACCTTCTTCAT                                                              |                                                                                                                                     |
| DH93       | ACGGTTACCGCGGGTTGCAGTATCGCTTCGACTACAAGGACGAC-<br>GATGACAAGTAACATATGAATATCCTCCTTAG | Used for <i>pgtE</i> -FLAG strain construction by<br>$\lambda$ <i>red</i> recombination                                             |
| DH94       | CGGTTATGACCGATGACATCCCGATGTGGTGTGTAGGCTGGAGCT-<br>GCTTC                           |                                                                                                                                     |
| DH95       | TCTCCAGATTACATCTGAATATGAGGACAAGAGAACATATGAATA-<br>TCCTCCTTA                       | Used for <i>pgtE</i> inactivation by $\lambda$ <i>red</i> recombination                                                             |
| DH96       | TCGGCCGGTTATGACCGATGACATCCCGATGTGGTGTGTAGGCTG-<br>GAGCT                           |                                                                                                                                     |
| DH97       | GACTGGGTTAAATGCGCATGA                                                             | Used for the sequencing check of the <i>pgtE</i> -FLAG strains                                                                      |
| DH98       | GCATAACCTTTCGAGCGGTT                                                              |                                                                                                                                     |
| del_waaG_F | AAATGCTGCCGCATGAGGCACGCACCATAGATTGGACAGCCTGC-<br>TATGAGTGTAGGCTGGAGCTGCTTC        | Used for <i>waaG</i> inactivation by $\lambda$ <i>red</i> recombination                                                             |
| del_waaG_R | TTAACGGCGCTTTCAGCTCAACCATCTAAATCACCTGTAATAATA-<br>TCCGCCATATGAATATCCTCCTTA        |                                                                                                                                     |
| NW_122     | ACGTGAATTCCTGGCCAAGCAATGTGCGC ( <b>EcoRI</b> )                                    | Construction of the pNAW41 suicide plasmid used for                                                                                 |
| NW_123     | ATCTTATCAAATCGTCCGACAAAGAGTAC                                                     | C <sup>4/74</sup> → T <sup>D23580</sup> substitution in the <i>pgtE</i> promoter of 4/74                                            |
| NW_124     | GTCCGACGATTTGATAAAGATGAAAACCTTCATCACCTCTCC                                        | by allelic exchange                                                                                                                 |
| NW_125     | ACGTGGATCCTGCAATAACCAACCTTTCAC ( <b>BamHI</b> )                                   |                                                                                                                                     |
| NW_155     | GACCGGATGATATCGAGCCG                                                              | Used for the sequencing check of the <i>pgtE</i> promoter allele                                                                    |
| NW_156     | TGCAATATCACCGGACATGC                                                              |                                                                                                                                     |
| qPCR_hns_f | TCTGAACAACATCCGTACTCTTC                                                           | Used for qRT-PCR of the <i>hns</i> transcript                                                                                       |
| qPCR_hns_r | TTCTTCTTCACGACGCTCATTA                                                            |                                                                                                                                     |

\*Relevant restriction sites are indicated in italics and specific mutated nucleotides are underlined.

#### Dataset S1. All TSS identified in D23580, and comparison with strain 4/74

##### [Dataset S1](#)

1. Kröger C, et al. (2012) The transcriptional landscape and small RNAs of *Salmonella enterica* serovar Typhimurium. *Proc Natl Acad Sci USA* 109:E1277–E1286.

#### Dataset S2. SNPs and indels in the D23580 genome compared with the 4/74 genome

##### [Dataset S2](#)

#### Dataset S3. All SNPs within the -40 bp region of identified primary TSS in D23580 and PUV values for the respective TSS in D23580 and 4/74

##### [Dataset S3](#)

#### Dataset S4. Accession numbers, phylogenetic designation, and *pgtE* TSS -40 sequence of all genomes sequences used in this study

##### [Dataset S4](#)
